# Supplementary material for: Season-long infection of diverse hosts by the entomopathogenic fungus Batkoa major
Source: PubMed Central journal article supplement (PMC9070890; doi:10.1371/journal.pone.0261912), 2022-05-05

## S1 Fig. Single locus trees

Absence of visible grouping of the hosts with particular clades of the pathogen on the single locus trees for ITS1 (S1 A), ITS2 (S1 B), 28S (S1 C), and *RPB2* trees (S1 D).

Fig. S1 A

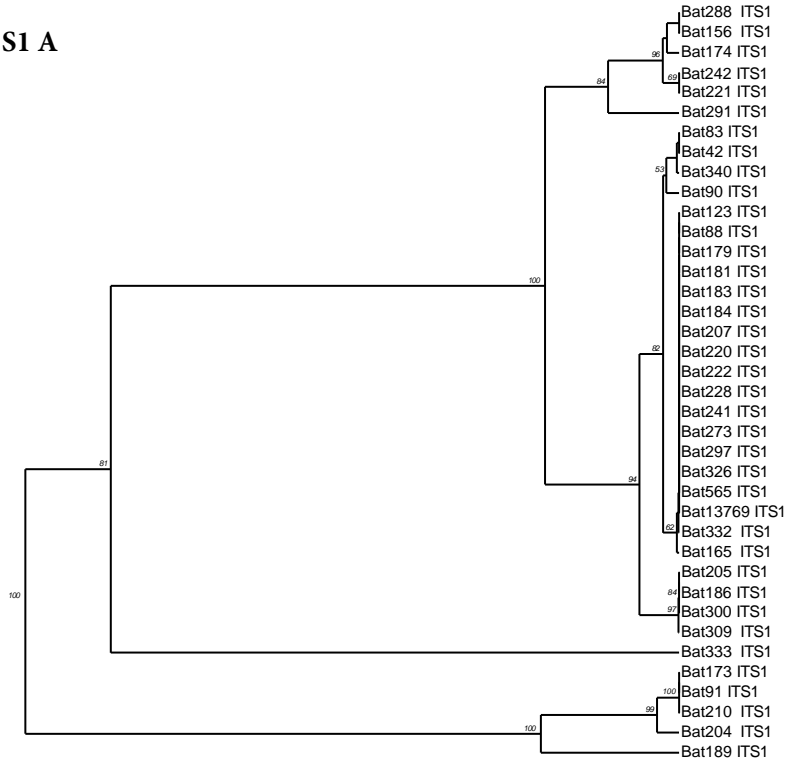

Fig. S1 B

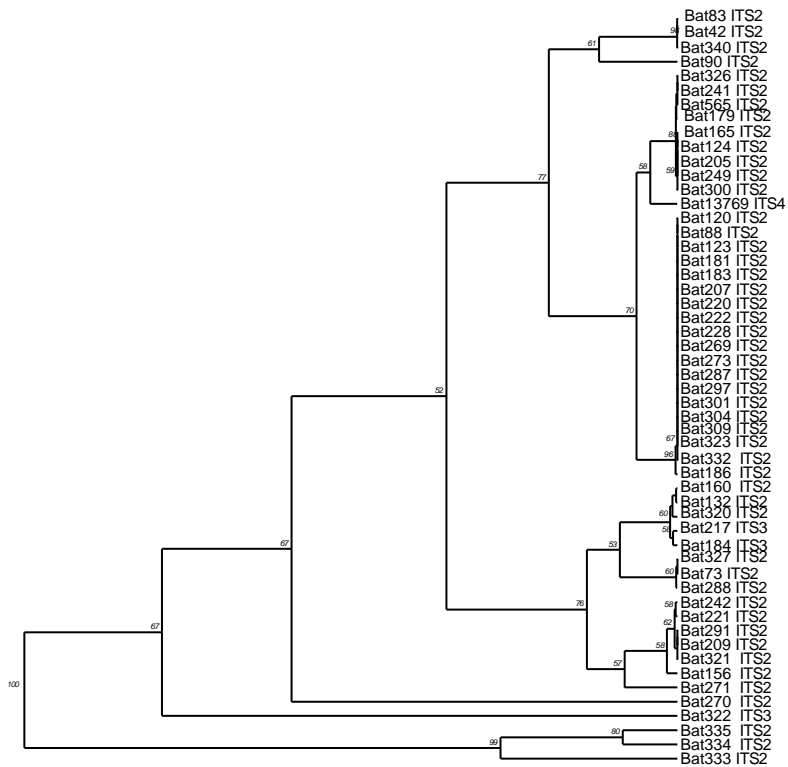

**Fig. S1 C**

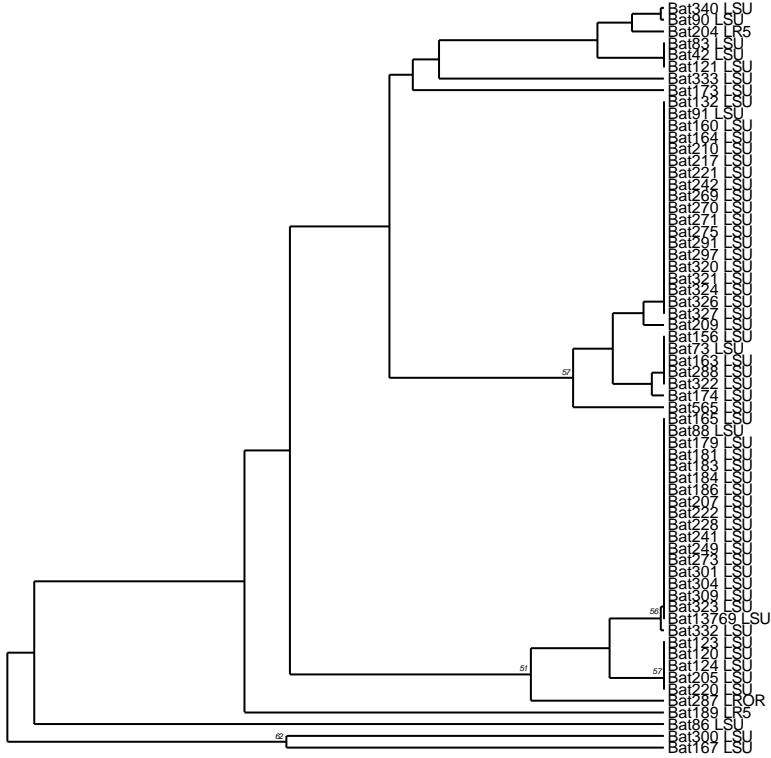

Fig. S1 D

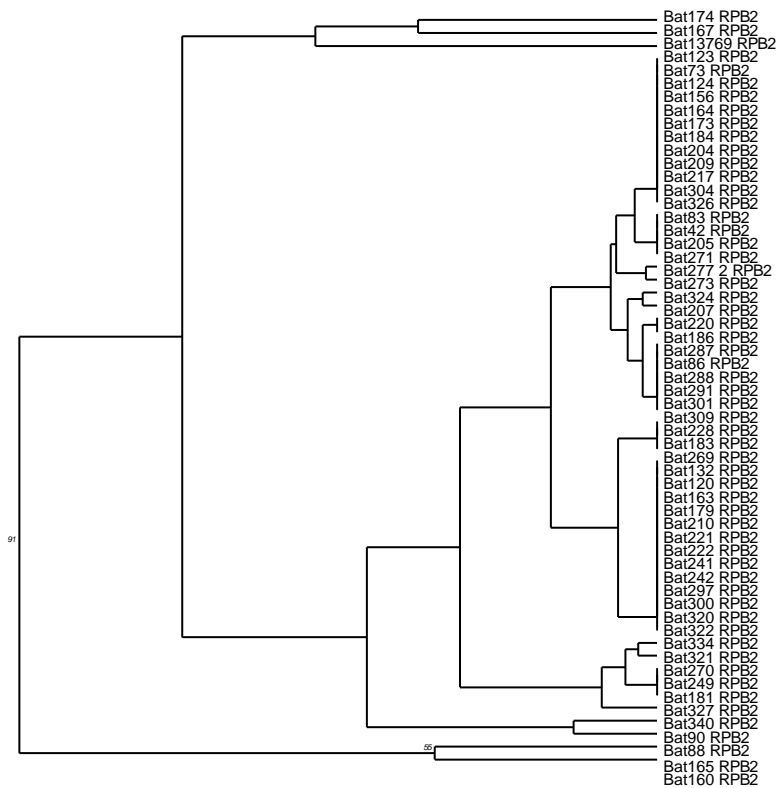

Supplement: pone.0261912.s001.pdf [file pone.0261912.s001.pdf]
